# Supplementary material for: The association between HIV infection and pulmonary function in a rural African population
Source: PubMed Central journal article supplement (PMC6333365; doi:10.1371/journal.pone.0210573), 2019-01-15
Supplement: pone.0210573.s002.pdf [file pone.0210573.s002.pdf]

|                                                                                                                                |                       |
|--------------------------------------------------------------------------------------------------------------------------------|-----------------------|
| <b>Baseline questionnaire about HIV characteristics, demographics, lifestyle and medication use</b><br><br><b>Breath study</b> | <b>Study number:</b>  |
|                                                                                                                                | <b>Age:</b>           |
|                                                                                                                                | <b>Date of visit:</b> |
|                                                                                                                                | <b>Fieldworker:</b>   |

*This questionnaire will take about 15 minutes. The questions are meant to get insight into pulmonary complaints and risk factors for lung diseases. Because a broad range of men and women are participating in the study, some questions in this interview may not apply to you. However we ask the same questions to all participants. Your answers are completely confidential. Your responses are linked only to confidential study number, not to your name. In case of any questions or troubles do not hesitate to ask the investigator.*

The next questions are about pulmonary complaints and risk factors for pulmonary diseases. Please tick **'Yes'** or **'No'** whenever possible. If you do not know an answer, or if a question does not apply to you, tick 'unknown'.

| <b>Cough</b>                                                                           | <b>Yes</b>                                                                                                                                                                       | <b>No</b>                              | <b>Unknown</b>                         |
|----------------------------------------------------------------------------------------|----------------------------------------------------------------------------------------------------------------------------------------------------------------------------------|----------------------------------------|----------------------------------------|
| 1. Do you cough several times most day?                                                | <input type="checkbox"/>                                                                                                                                                         | <input type="checkbox"/> → go to 5     | <input type="checkbox"/>               |
| <i>If Yes to 1</i>                                                                     |                                                                                                                                                                                  |                                        |                                        |
| 2. When do you cough?                                                                  | <input type="checkbox"/> I wake up with cough<br><input type="checkbox"/> In the morning<br><input type="checkbox"/> During the day<br><input type="checkbox"/> During the night |                                        |                                        |
| 3. Is it a chronic cough? ( <i>lasting for more than 2 consecutive months</i> )        | <input type="checkbox"/>                                                                                                                                                         | <input type="checkbox"/>               | <input type="checkbox"/>               |
| 4. For how long have you been coughing?                                                | .....years                                                                                                                                                                       |                                        |                                        |
| <b>Sputum</b>                                                                          | <b>Yes</b>                                                                                                                                                                       | <b>No</b>                              | <b>Unknown</b>                         |
| 5. Do you bring up phlegm or mucus on most days?                                       | <input type="checkbox"/>                                                                                                                                                         | <input type="checkbox"/><br>→ go to Q8 | <input type="checkbox"/><br>→ go to Q8 |
| <i>If Yes to 5</i>                                                                     |                                                                                                                                                                                  |                                        |                                        |
| 6. When do you bring up phlegm or mucus?                                               | <input type="checkbox"/> first thing in the morning<br><input type="checkbox"/> during the day                                                                                   |                                        |                                        |
| 7. Do you have a chronic phlegm? ( <i>lasting for more than 2 consecutive months</i> ) | <input type="checkbox"/>                                                                                                                                                         | <input type="checkbox"/>               | <input type="checkbox"/>               |

**MRC Breathlessness Scale**

*If you are disabled from walking by any condition other than heart or lung disease, omit question 20 and enter '1' here*

8. Which of the following statements best describes your situation?

- 1 Not troubled by breathlessness except on strenuous exercise
- 2 Short of breath when hurrying on the level or walking up a slight hill
- 3 Walks slower than most people on the level, stops after a mile or so, or stops after 15 minutes walking at own pace
- 4 Stops for breath after walking about 100 yards or after walking a few minutes in level ground
- 5 Too breathless to leave house, or breathless when undressing

**Wheezing**

|                                                                                                   |                          |                                         |                                         |
|---------------------------------------------------------------------------------------------------|--------------------------|-----------------------------------------|-----------------------------------------|
| 9. Have you had attacks of wheezing or whistling in your chest at any time in the last 12 months? | <input type="checkbox"/> | <input type="checkbox"/><br>→ go to Q14 | <input type="checkbox"/><br>→ go to Q14 |
| 10. Have you been at all breathless when wheezing was present?                                    | <input type="checkbox"/> | <input type="checkbox"/>                | <input type="checkbox"/>                |
| 11. Is/was your breathing absolutely normal between attacks?                                      | <input type="checkbox"/> | <input type="checkbox"/>                | <input type="checkbox"/>                |
| 12. Do you wake up with wheezing?                                                                 | <input type="checkbox"/> | <input type="checkbox"/>                | <input type="checkbox"/>                |
| 13. For how long do you wheeze or have any whistling on the chest?                                | .....years               |                                         |                                         |

**Exacerbations**

|                                                                                                                                   |                          |                                         |                                         |
|-----------------------------------------------------------------------------------------------------------------------------------|--------------------------|-----------------------------------------|-----------------------------------------|
| 14. Did you have periods of increased breathing difficulty with increased cough with or without sputum during the last 12 months? | <input type="checkbox"/> | <input type="checkbox"/><br>→ go to Q16 | <input type="checkbox"/><br>→ go to Q16 |
| <i>If Yes to 14</i>                                                                                                               |                          |                                         |                                         |
| 15. How many times did you have such period during the last 12 months?                                                            | .....times               |                                         |                                         |

**Past illnesses**

*Have you ever had, or been told that you have had:*

|                                                  | Yes                      | No                       | Unknown                  |
|--------------------------------------------------|--------------------------|--------------------------|--------------------------|
| 16a. An injury or operation affecting your chest | <input type="checkbox"/> | <input type="checkbox"/> | <input type="checkbox"/> |
| 16b. Heart trouble                               | <input type="checkbox"/> | <input type="checkbox"/> | <input type="checkbox"/> |

|                                                                                          |                                                                                                                                                                                                                                                                                                                              |                          |                          |
|------------------------------------------------------------------------------------------|------------------------------------------------------------------------------------------------------------------------------------------------------------------------------------------------------------------------------------------------------------------------------------------------------------------------------|--------------------------|--------------------------|
| 16c. Pneumonia                                                                           | <input type="checkbox"/>                                                                                                                                                                                                                                                                                                     | <input type="checkbox"/> | <input type="checkbox"/> |
| 16d. Bronchial asthma                                                                    | <input type="checkbox"/>                                                                                                                                                                                                                                                                                                     | <input type="checkbox"/> | <input type="checkbox"/> |
| 16e. Hay fever                                                                           | <input type="checkbox"/>                                                                                                                                                                                                                                                                                                     | <input type="checkbox"/> | <input type="checkbox"/> |
| 16f. Other chest trouble                                                                 | <input type="checkbox"/>                                                                                                                                                                                                                                                                                                     | <input type="checkbox"/> | <input type="checkbox"/> |
| <i>If yes to one of the above mentioned questions (16a-16f)</i>                          |                                                                                                                                                                                                                                                                                                                              |                          |                          |
| 16g. Did/do you receive treatment for this/these condition(s)?                           | <input type="checkbox"/>                                                                                                                                                                                                                                                                                                     | <input type="checkbox"/> | <input type="checkbox"/> |
| 17. Did you ever have tuberculosis?                                                      | <input type="checkbox"/> Yes, I have active TB now<br><input type="checkbox"/> Yes, I had TB in the past but was treated and I am cured now<br><input type="checkbox"/> Yes, I had TB in the past but I could not complete treatment<br><input type="checkbox"/> No, I never had TB<br><input type="checkbox"/> I don't know |                          |                          |
| <i>If yes to 17</i>                                                                      |                                                                                                                                                                                                                                                                                                                              |                          |                          |
| 18. In which year were you diagnosed with TB?                                            | _____ year                                                                                                                                                                                                                                                                                                                   |                          |                          |
| 19. For how long did you take or do you have to take treatment?                          | <input type="checkbox"/> 6 months<br><input type="checkbox"/> 9 months<br><input type="checkbox"/> other.....                                                                                                                                                                                                                |                          |                          |
| <b>Occupational history (ATS-DLD-78-A)</b>                                               |                                                                                                                                                                                                                                                                                                                              |                          |                          |
|                                                                                          | <b>Yes</b>                                                                                                                                                                                                                                                                                                                   | <b>No</b>                | <b>Unknown</b>           |
| 20. Have you ever worked for a year or more in the mining industry?                      | <input type="checkbox"/>                                                                                                                                                                                                                                                                                                     | <input type="checkbox"/> | <input type="checkbox"/> |
| <i>If yes to 20</i>                                                                      |                                                                                                                                                                                                                                                                                                                              |                          |                          |
| 21. For how long did you work in the mining industry?                                    | Total years worked:                                                                                                                                                                                                                                                                                                          |                          |                          |
|                                                                                          | <b>Yes</b>                                                                                                                                                                                                                                                                                                                   | <b>No</b>                | <b>Unknown</b>           |
| 22. Have you ever worked for a year or more in a dusty job (except the mining industry)? | <input type="checkbox"/>                                                                                                                                                                                                                                                                                                     | <input type="checkbox"/> | <input type="checkbox"/> |
| <i>If yes to 22</i>                                                                      |                                                                                                                                                                                                                                                                                                                              |                          |                          |
| 23. For how long did you work in this dusty job?                                         | Total years worked:                                                                                                                                                                                                                                                                                                          |                          |                          |
|                                                                                          | <b>Mild</b>                                                                                                                                                                                                                                                                                                                  | <b>Moderate</b>          | <b>Severe</b>            |
| 24. Was dust exposure mild, moderate or severe? (please indicate the category)           | <input type="checkbox"/>                                                                                                                                                                                                                                                                                                     | <input type="checkbox"/> | <input type="checkbox"/> |
|                                                                                          | <b>Yes</b>                                                                                                                                                                                                                                                                                                                   | <b>No</b>                | <b>unknown</b>           |
| 25. Have you ever been exposed to gas or chemical fumes in your work?                    | <input type="checkbox"/>                                                                                                                                                                                                                                                                                                     | <input type="checkbox"/> | <input type="checkbox"/> |
| <i>If yes to 25</i>                                                                      |                                                                                                                                                                                                                                                                                                                              |                          |                          |

|                                                                                                        |                                            |                          |                          |
|--------------------------------------------------------------------------------------------------------|--------------------------------------------|--------------------------|--------------------------|
| 26. Please specify job/industry:                                                                       | Total years worked:                        |                          |                          |
|                                                                                                        | <b>Mild</b>                                | <b>Moderate</b>          | <b>Severe</b>            |
| 27. Was gas or chemical fumes exposure mild, moderate or severe? <i>(please indicate the category)</i> | <input type="checkbox"/>                   | <input type="checkbox"/> | <input type="checkbox"/> |
| 28. What has been your usual occupation or job / the one you have worked at the longest?               |                                            |                          |                          |
| 29. Number of years employed in this occupation                                                        | years                                      |                          |                          |
| 30. What is your current occupation?                                                                   |                                            |                          |                          |
| <b>Indoor air pollution</b> (WHO World health survey 2002)                                             |                                            |                          |                          |
| 31. What type of fuel does your household mainly use for cooking?                                      | Gas                                        | <input type="checkbox"/> |                          |
|                                                                                                        | electricity                                | <input type="checkbox"/> |                          |
|                                                                                                        | Paraffin                                   | <input type="checkbox"/> |                          |
|                                                                                                        | Kerosene                                   | <input type="checkbox"/> |                          |
|                                                                                                        | Coal                                       | <input type="checkbox"/> |                          |
|                                                                                                        | Charcoal                                   | <input type="checkbox"/> |                          |
|                                                                                                        | Wood                                       | <input type="checkbox"/> |                          |
|                                                                                                        | Agriculture/crop                           | <input type="checkbox"/> |                          |
|                                                                                                        | Animal dung                                | <input type="checkbox"/> |                          |
|                                                                                                        | Shrubs/grass                               | <input type="checkbox"/> |                          |
| Other:                                                                                                 | <input type="checkbox"/>                   |                          |                          |
| 32. What type of cooking stove is used in your house?                                                  | Open fire or stove without chimney or hood | <input type="checkbox"/> |                          |
|                                                                                                        | Open fire or stove with chimney or hood    | <input type="checkbox"/> |                          |
|                                                                                                        | Closed stove with chimney                  | <input type="checkbox"/> |                          |
|                                                                                                        | Other                                      | <input type="checkbox"/> |                          |
| 33. What type of house do you have?                                                                    | Flat                                       | <input type="checkbox"/> |                          |
|                                                                                                        | Self-contain / house                       | <input type="checkbox"/> |                          |
|                                                                                                        | One room                                   | <input type="checkbox"/> |                          |
|                                                                                                        | Passage                                    | <input type="checkbox"/> |                          |
| 34. Where is cooking usually done?                                                                     | In a room used for living or sleeping      | <input type="checkbox"/> |                          |
|                                                                                                        | In a separate room used as kitchen         | <input type="checkbox"/> |                          |
|                                                                                                        | In a separate building used as             | <input type="checkbox"/> |                          |

|                                                                         |                                            |                                            |                          |
|-------------------------------------------------------------------------|--------------------------------------------|--------------------------------------------|--------------------------|
|                                                                         | kitchen                                    |                                            |                          |
|                                                                         | Outdoors                                   | <input type="checkbox"/>                   |                          |
| 35. Do you heat your house when it is cold?                             | Yes <input type="checkbox"/>               | No <input type="checkbox"/><br>→ go to Q40 |                          |
| 36. What type of fuel does your household mainly use for heating?       | Gas                                        | <input type="checkbox"/>                   |                          |
|                                                                         | Electricity                                | <input type="checkbox"/>                   |                          |
|                                                                         | Paraffin                                   | <input type="checkbox"/>                   |                          |
|                                                                         | Kerosene                                   | <input type="checkbox"/>                   |                          |
|                                                                         | Coal                                       | <input type="checkbox"/>                   |                          |
|                                                                         | Charcoal                                   | <input type="checkbox"/>                   |                          |
|                                                                         | Wood                                       | <input type="checkbox"/>                   |                          |
|                                                                         | Agriculture/crop                           | <input type="checkbox"/>                   |                          |
|                                                                         | Animal dung                                | <input type="checkbox"/>                   |                          |
|                                                                         | Shrubs/grass                               | <input type="checkbox"/>                   |                          |
|                                                                         | Other:                                     | <input type="checkbox"/>                   |                          |
| 37. What type of heating stove is used in your house?                   | Open fire or stove without chimney or hood | <input type="checkbox"/>                   |                          |
|                                                                         | Open fire or stove with chimney or hood    | <input type="checkbox"/>                   |                          |
|                                                                         | Closed stove with chimney                  | <input type="checkbox"/>                   |                          |
|                                                                         | Other                                      | <input type="checkbox"/>                   |                          |
| 38. How much time do you on average spent in the cooking place per day? | More than 6 hours                          | <input type="checkbox"/>                   |                          |
|                                                                         | 4-6 hours                                  | <input type="checkbox"/>                   |                          |
|                                                                         | 1-3 hours                                  | <input type="checkbox"/>                   |                          |
|                                                                         | Less than 1 hour                           | <input type="checkbox"/>                   |                          |
| 39. How much time do you on average spent close to a fire per day?      | More than 6 hours                          | <input type="checkbox"/>                   |                          |
|                                                                         | 4-6 hours                                  | <input type="checkbox"/>                   |                          |
|                                                                         | 1-3 hours                                  | <input type="checkbox"/>                   |                          |
|                                                                         | Less than 1 hour                           | <input type="checkbox"/>                   |                          |
| 40. Does anybody in your household smoke inside the house?              | Yes <input type="checkbox"/>               | No <input type="checkbox"/>                |                          |
| <b>Family history of pulmonary diseases (ATS-DLD-78a)</b>               |                                            |                                            |                          |
| 41. Did either of your natural parents have a chronic lung condition?   | Yes <input type="checkbox"/>               | No <input type="checkbox"/>                |                          |
| If yes to 41                                                            |                                            |                                            |                          |
| 42. Please specify which disease is was:                                |                                            |                                            |                          |
| <b>Exposure in the past</b>                                             |                                            |                                            |                          |
|                                                                         | <b>Yes</b>                                 | <b>No</b>                                  | <b>unknown</b>           |
| 43. Did anybody in your household smoke in                              | <input type="checkbox"/>                   | <input type="checkbox"/>                   | <input type="checkbox"/> |

|                                                                                               |                                                     |                                                   |                                                   |
|-----------------------------------------------------------------------------------------------|-----------------------------------------------------|---------------------------------------------------|---------------------------------------------------|
| childhood?                                                                                    |                                                     |                                                   |                                                   |
| 44. Did anybody in your household smoke <u>insight the house</u> in childhood?                | <input type="checkbox"/>                            | <input type="checkbox"/>                          | <input type="checkbox"/>                          |
| 45. Was cooking done indoors or was there a fire place <u>insight the house</u> in childhood? | <input type="checkbox"/>                            | <input type="checkbox"/>                          | <input type="checkbox"/>                          |
| <b>General</b>                                                                                |                                                     |                                                   |                                                   |
|                                                                                               | <b>Yes</b>                                          | <b>No</b>                                         | <b>unknown</b>                                    |
| 46. Did you ever use intravenous drugs?                                                       | <input type="checkbox"/>                            | <input type="checkbox"/><br>→End of questionnaire | <input type="checkbox"/><br>→End of questionnaire |
| 47. Did you use intravenous drugs in the past 3 months?                                       | <input type="checkbox"/>                            | <input type="checkbox"/><br>→End of questionnaire | <input type="checkbox"/><br>→End of questionnaire |
| 48. How often do you use intravenous drugs?                                                   | ....times per month/week<br>(please indicate which) |                                                   |                                                   |

**End of questionnaire. Thanks for your participation!**
